# Supplementary material
Source: Elsevier journal article supplement (https://www.sciencedirect.com/science/article/pii/S0213911117300948)
Supplement: mmc3 [file S0213911117300948:mmc3.docx]

**Appendix Online 3. Results of models**

Phase 1: Pre-transplant

Phase 2: 1º year after transplant

Phase 3: 2º-6º year after transplant
